# Supplementary material for: The transcription factor ZIP-1 promotes resistance to intracellular infection in Caenorhabditis elegans
Source: PubMed Central journal article supplement (PMC8748929; doi:10.1038/s41467-021-27621-w), 2022-01-10
Supplement: 41467_2021_27621_MOESM2_ESM.pdf [file 41467_2021_27621_MOESM2_ESM.pdf]

## **Description of Additional Supplementary Files**

Supplementary Data 1: Results of RNAi screens

Supplementary Data 2: Differentially expressed genes in animals treated with bortezomib and DMSO

Supplementary Data 3: RNA-seq data comparisons

Supplementary Data 4: RNA-seq analysis, normalized counts
